# Supplementary material for: Early-Life Antibiotic Exposure and the Risk of Overweight and Obesity in Children
Source: Research Square preprint supplement (doi:10.21203/rs.3.rs-6622850/v1), 2025-05-15
Supplement: Supplementary file 2 [file a039cb7b57508369bc96509b.docx]

| **Supplementary Table 1. Literature review of early antibiotic exposure and weight gain in children.** | | | | | | | | | |
| --- | --- | --- | --- | --- | --- | --- | --- | --- | --- |
| **Study** | **Country** | **Study population** | **Antibiotic exposure**  **before pregnancy** | **Antibiotic**  **exposure**  **during**  **pregnancy** | **Antibiotic**  **exposure**  **during**  **birth** | **Antibiotic exposure after birth** | **Outcome** | **Findings** | |
| Ajslev, T et al. Childhood overweight after establishment of the gut microbiota: the role of delivery mode, pre-pregnancy weight and early administration of antibiotics. Int J Obes (Lond). 2011.43 | Denmark | Vaginally delivered and  C-section  N = 28 354 | NR | NR | NR | Antibiotic prescription < 6 months of age. | Overweight at 7 years of age. | Antibiotic exposure associated with increased risk of overweight in offspring of normal-weight mothers and reduced risk in offspring of mothers with overweight or obesity. | |
| Aris IM et al. Association of Early Antibiotic Exposure With Childhood Body Mass Index Trajectory Milestones. JAMA Netw Open. 2021.44 | USA | Vaginally delivered and  C-section  N = 183 444 | NR | NR | NR | Antibiotic use before 48 months of age. | Age and magnitude of BMI peak and BMI rebound. | Association between antibiotic exposure before 48 months of age and later age at BMI trajectory milestones known as risk factors for obesity was found. | |
| Aversa Z et al. Association of Infant Antibiotic Exposure With Childhood Health Outcomes. Mayo Clin Proc. 2021.45 | USA | Vaginally delivered and  C-section  N = 14 527 | NR | NR | NR | Antibiotic prescription during the first two years of life. | Overweight and obesity. | Association between early antibiotic exposure and obesity was found. | |
| Awujoola A, et al. Neonatal Ampicillin/Gentamicin Exposure and the Risk of Childhood Obesity in South Bronx Pediatric Population. Am J Perinatol. 2023.4 | USA | Vaginally delivered and C-section  N = 1447 | NR | NR | Intrapartum GBS prophylaxis as a covariate. | Neonatal antibiotic exposure in the first 28 days of life. | CDC BMI percentile at 5 years old. Overweight and obesity. | Neonatal antibiotic exposure associated with early childhood obesity at 5 years.  No statistically significant difference in exposure to GBS intrapartum antibiotic prophylaxis was found among the children with and without obesity. | |
| Azad MB et al. Infant antibiotic exposure and the development of childhood overweight and central adiposity. Int J Obes (Lond). 2014.46 | Canada | Vaginally delivered  and  C-section  N = 616 | NR | NR | NR | Any antibiotic exposure during the first year of life. | BMI and waist circumference, overweight and high central adiposity at ages 9 and 12 years. | Association between antibiotic exposure and risk of overweight and central adiposity was found among boys. | |
| Bailey LC et al. Association of antibiotics in infancy with early childhood obesity. JAMA Pediatr. 2014.47 | USA | Vaginally delivered and  C-section  N = 65 480 | NR | NR | NR | Antibiotic exposure between birth and 23 months. | BMI at age 24 to 59 months. Obesity and overweight at the age of 24 to 59 months. | Cumulative exposure to antibiotics and early exposure to broad-spectrum antibiotics associated with later obesity. | |
| Bailey LC, et al. Antibiotics prior to age 2 years have limited association with preschool growth trajectory. Int J Obes (Lond). 2022.48 | USA | Vaginally delivered  and  C-section  N = 430 376 | NR | NR | NR | Antibiotic exposure before 24 months. | Weight and height measured between 24 and 72 months. | Association between antibiotic exposure and greater rate of weight gain was found. | |
| Block JP et al. Early Antibiotic Exposure and Weight Outcomes in Young Children. Pediatrics. 2018.41 | USA | Vaginally delivered and  C-section  N = 362 550 | NR | NR | NR | Antibiotic use at <24 months of age. | BMI z-score measured closest to 60 months of age (48 to < 72 months of age), overweight and obesity. | Association between antibiotic use and higher mean BMI and higher odds of overweight or obesity was found. | |
| Bridgman SL et al. Impact of maternal pre-pregnancy overweight on infant overweight at 1 year of age: associations and sex-specific differences. Pediatr Obes. 2018.5 | Canada | Vaginally delivered and  C-section  N = 955 | NR | NR | Maternal antibiotic prophylaxis | Intravenous antibiotics at birth and/or oral prescription in the first 3 months. | Weight for length z-score and overweight at 1 year of age. | No association between intrapartum antibiotic exposure and overweight was found. Association between postnatal antibiotic exposure and overweight in females, but not in males, was found. | |
| Campbell S et al. Childhood infection, antibiotic exposure and subsequent metabolic risk in adolescent and young adult Aboriginal Australians: practical implications. Aust J Prim Health. 2019.32 | Australia | N = 343 | NR | NR | NR | Antibiotic prescription at 0-15 years of age. | Obesity, defined as BMI ≥ 30 kg/m2 at 15-19 year of age. | No association between childhood antibiotic exposure and later obesity was found. | |
| Cassidy-Bushrow AE et al. Prenatal antimicrobial use and early-childhood body mass index. Int J Obes (Lond). 2018.21 | USA | Vaginally delivered and  C-section  N = 527 | NR | Systemic antibiotic use at any time during pregnancy. | NR | NR | BMI Z-score, overweight and obesity at 2 years of age. | Association between prenatal antibiotic use and higher mean BMI Z-score at age 2 years was found. 1st and 2nd trimester exposures associated more strongly with larger BMI at age 2 years for both BMI Z-score and overweight/obesity. | |
| Chelimo C, et al. Association of Repeated Antibiotic Exposure Up to Age 4 Years With Body Mass at Age 4.5 Years. JAMA Netw Open. 2020.49 | New Zealand | Vaginally delivered and  C-section  N = 5128 | NR | Antibiotic exposure during pregnancy as a covariate. | NR | Antibiotic exposure, number of antibiotic courses, timing of the antibiotic exposure up to 48 months of age. | BMI-for-age *z* scores; overweight and obesity at 4.5 years of age. | Repeated antibiotic courses (4 or more) associated with higher mean BMI-for-age z-score and (9 or more) increased risk of obesity. Receiving 2 or more antibiotic courses during pregnancy associated with increased BMI and greater risk of obesity. | |
| Chen LW, et al. Implication of gut microbiota in the association between infant antibiotic exposure and childhood obesity and adiposity accumulation. Int J Obes (Lond). 2020.50 | Singapore | Vaginally delivered and  C-section  N = 1172 | NR | NR | NR | Antibiotic exposure and number of antibiotic courses in the first 12 months of life. | Childhood obesity, adiposity and skinfold determined from ages 15 to 60 months. | Association with antibiotic exposure and increased risk of childhood obesity and increased adiposity. | |
| Contopoulos-Ioannidis DG et al. Effect of long-term antibiotic use on weight in adolescents with acne. J Antimicrob Chemother. 2016.33 | USA | Vaginally delivered and  C-section  N = 1012 | NR | NR | NR | Antibiotic exposure over 4 weeks for acne in age 12 to 20 years. | Weight for age z-score, BMI z-score before and after antibiotic exposure. | No association between antibiotic exposure and weight gain was found. | |
| Dawson-Hahn EE, et al. The association between antibiotics in the first year of life and child growth trajectory. BMC Pediatr. 2019.51 | USA | Vaginally delivered and C-section  N = 586 | NR | NR | NR | Antibiotic exposure and number of antibiotic courses in the first 12 months of life. | Infant weight-for-length z-socre at 2, 4, 6 and 12 months and BMI z-score at 72 months. Overweight and obesity at 6 years of age. | Antibiotic use associated with increased growth up to 72 months of age. | |
| Edmonson MB, et al. Weight Gain and Obesity in Infants and Young Children Exposed to Prolonged Antibiotic Prophylaxis. JAMA Pediatr. 2017.31 | USA | N = 607 | NR | NR | NR | Trimethoprim-sulfamethoxazole or placebo taken orally, once daily, for 2 years (median age of 12 months). | Weight gain as measured by change from baseline to the end-of-study visit after 24 months. Secondary outcomes included weight gain at 6, 12, and 18 months and overweight or obesity at 24 months. | No association between antibiotic exposure and weight gain, obesity or overweight was found. | |
| Figueiredo RAO, et al. Lifetime antimicrobial use is associated with weight status in early adolescence-A register-based cohort study. Pediatr Obes. 2021.16 | Finland | N = 10 093 | NR | Mother’s antimicrobial use during pregnancy. | NR | Antibiotic use in first 6 months, for each full year of age, total use from birth to early adolescence. | Children’s BMI categorized as 1) thin, 2) normal weight, 3) overweight and obesity at adolescence (average age 11.2 years). | Mother’s antimicrobial use did not associate with child’s weight status. Higher lifetime antibiotic use during childhood positively associated with overweight and inversely with thinness. | |
| Gerber JS, et al. Antibiotic Exposure During the First 6 Months of Life and Weight Gain During Childhood. JAMA. 2016.52 | USA | Vaginally delivered and  C-section  N = 38 522 | NR | NR | NR | Antibiotic use in the first 6 months and 24 months of life. | Weight longitudinally measured in the first 8 years of life. | No association with antibiotic exposure in the first 6 months was found. Antibiotic exposure in the first 24 months associated with a small increase in weight gain (150 g/3 years). | |
| Gardemeister, S. et al. Cross-sectional study of the proportion of antibiotic use during childbirth in full-term deliveries in Finland. BMC Pregnancy Childbirth. 2023.8 | Finland | Vaginally delivered and  C-section  N = 1019 | NR | NR | Maternal antibiotic exposure during childbirth | NR | Median weight at the first 4 months of age. | Association between intrapartum antibiotic exposure and higher weight at 3 months. No associations in earlier months or at 4 months of age. | |
| Gofin R et al. Bacteriuria in pregnancy and growth and development of the infants. Early Hum Dev. 1984.17 | Israel | Vaginally delivered and  C-section  N = 1797 | NR | Antibiotic exposure during pregnancy received to treat bacteriuria. | NR | NR | Mean weight and length at 1,3,6, 9 and 12 months of age. | No association was found. | |
| Guidos PJ et al. Impact of continuous low-dose antibiotic prophylaxis on growth in children with vesicoureteral reflux. J Pediatr Urol. 2018.68 | USA | N = 180 | NR | NR | NR | Continuous antibiotic prophylaxis for vesicoureteral reflux (> 12 months) at the mean age of 29.2 months. | Change in weight and height percentiles, BMI, BMI percentile. | Association between continuous antibiotic prophylaxis and increase in BMI in children with prior antibiotic use was found. | |
| Gürpinar AN, et al. The effects of a fluoroquinolone on the growth and development of infants. J Int Med Res. 1997.38 | Turkey | N = 27 | NR | NR | NR | Ciprofloxaxin 20 mg/kg/day in the neonatal period treating sepsis versus Cefotaxime given to treat sepsis versus healthy neonates. | Weight, height and head circumference fom birth to 42 months of age. | No differences in weight, height or head circumference were seen between the groups. | |
| Heerman WJ et al. Maternal antibiotic use during pregnancy and childhood obesity at age 5 years. Int J Obes (Lond). 2019.18 | USA | Vaginally delivered and  C-section  N = 53 320 | NR | Outpatient maternal antibiotic prescriptions during pregnancy. | NR | NR | BMI z-score from 48 to <72 months (“age 5 years”). Overweight or obesity from 48 to <72 months. | No association between maternal antibiotic use during pregnancy and BMI z-score or childhood obesity at 5 years of age. | |
| Hutton EK et al. Associations of intrapartum antibiotics and growth, atopy, gastrointestinal and sleep outcomes at one year of age. Pediatr Res. 2023.9 | Canada | Vaginally delivered  n = 212 | NR | NR | Maternal antibiotic exposure at any point from onset of labour and prior to birth. | NR | Mass at 1-year, length at 1-year, ponderal index at 1-year, BMI z-score at 1 year, fat mass index at 5 months, lean mass index at 5 months. | Intrapartum antibiotic exposure was not associated with measures of growth or fat accretion at 1 year of age. Intrapartum exposure to antibiotic ≥4 h duration was independently associated with fat mass index at 5 months of age. | |
| Isaevska E, et al. Maternal antibiotic use and vaginal infections in the third trimester of pregnancy and the risk of obesity in preschool children. Pediatr Obes. 2020.19 | Italy | Vaginally delivered N = 3151 C-section  N = 1111 | NR | Any antibiotic taken by the mother in the last pregnancy trimester. | NR | NR | BMI, classified as thinness grade 3, 2 and 1, normal BMI, overweight and obesity at 4 years of age. | No statistically significant association was found between third trimester antibiotic use and overweight/obesity at 4 years of age. | |
| Jess T. et al. Antibiotic use during pregnancy and childhood overweight: A population-based nationwide cohort study. Sci Rep. 2019.22 | Denmark | Vaginally delivered and C-section N = 43 365 | NR | Antibiotic exposure during pregnancy | NR | NR | BMI z-score, overweight (including obesity) and thinness grade 2 at age 7 and 11 years. | Prenatal antibiotic exposure did not associate with odds of overweight at age 7 and 11 years. Exposure to broad-spectrum antibiotics was associated with higher odds of overweight at age 7 years but not at age 11 years. | |
| Kamphorst K, et al. Antibiotic Treatment in the First Week of Life Impacts the Growth Trajectory in the First Year of Life in Term Infants. J Pediatr Gastroenterol Nutr. 2019.53 | Netherlands | N = 436 | NR | NR | NR | Antibiotic exposure during the first week of life. Antibiotic exposure during the first year of life. | Length-for-age, weight-for-age at 1 year of age | Weight-for-age and length-for-age increase was lower in the group exposed to antibiotics in the first week of life. Antibiotic exposure in the first year of life associated with increased growth. | |
| Kelly D et al. Antibiotic use in early childhood and risk of obesity: longitudinal analysis of a national cohort. World J Pediatr. 2019.54 | Ireland | Vaginally delivered  and C-section N = 8186 | NR | NR | NR | Antibiotic exposure during the last 12 months asked at age 3 and 5. | Weight, length, heigh, BMI z-scores, overweight and obesity at 9 months, 3 years and 5 years of age. | No association was found between antibiotic use in the first 2 to 3 years of life or risk of overweight or obesity at 5 years of age. Association between four or more antibiotic courses and obesity at age 5 was found. | |
| Klancic T et al. Influence of antibiotics given during labour and birth on body mass index z scores in children in the All Our Families pregnancy cohort. Pediatr Obes. 2022.10 | Canada | Vaginally delivered and  C-section  N = 1262 | NR | NR | Intrapartum antibiotic prophylaxis exposure for all indications of antibiotics documented in obstetrical/birth record. | NR | Age- and sex-specific BMI-for-age z-scores at 1, 2 and 3 years | Children exposed to IAP had significantly higher mean BMI *z* scores at 1 year of age. Association was no longer significant after adjustment for confounding factors in the growth trajectory model, IAP resulted in a 0.255 unit increase in BMI *z* score at 1 year of age. No association at 2 or 3 years after adjusting was found. | |
| Koebnick C et al. Intrapartum Antibiotic Exposure and Body Mass Index in Children. Clin Infect Dis. 2021.12 | USA | Vaginal delivery N = 156 381 C-section N = 67 050 | NR | Antibiotic exposure during pregnancy. | GBS-IAP = administration of penicillin G, ampicillin, cefazolin, clindamycin and/or vancomycin for  ≥ 4 hours before deliveryOther IAP = any other type of duration of intrapartum antibiotics | Antibiotic exposure during the first 0-6 months and in the childhood. | Body weight, height, BMI during the first 5 years of life. | GBS-IAP associated with higher BMI from 0.5 to 5 years of life in vaginal deliveries. Antibiotic exposure during third trimester associated with higher BMI. Antibiotic exposure during the first 3 months of life and during childhood associated with higher BMI. Other IAP associated with higher BMI from 0.3 to 5.0 years of age. In C-section GBS-IAP associated with higher BMI from 0.7 years to 5.0 years. | |
| Korpela K et al. Childhood BMI in relation to microbiota in infancy and lifetime antibiotic use. Microbiome. 2017.39 | Finland,  Netherlands | Vaginally delivered  N = 152 | NR | NR | NR | Antibiotic use in the first 5-6 years of life. | BMI at 5-6 years. | No positive association between antibiotic use and BMI was seen. | |
| Kwak JH, et al. Association of Antibiotic Use during the First 6 Months of Life with Body Mass of Children. Antibiotics (Basel). 2022.55 | Korea | Vaginally delivered and  C-section N = 369 758 | NR | NR | NR | Antibiotic exposure in the first 6 months of life. | Height and weight from 30 to 72 months. Stunting, short stature, overweight and obesity at 30 to 72 months. | Antibiotic use associated with increased risk of stunting, short stature, overweight and obesity in preschool children. | |
| Leong KSW et al. Associations of Prenatal and Childhood Antibiotic Exposure With Obesity at Age 4 Years. JAMA Netw Open. 20201 | New Zealand | Vaginally delivered and C-section N = 151 359 | Antibiotic exposure 3 months before pregnancy. | Antibiotics dispensed among pregnant women per trimester. | NR | Antibiotic exposure from birth to 2 years. | BMI *z*-score and obesity at 4 years of age. | Prenatal antibiotic exposure associated with odds of developing obesity at 4 years. Childhood antibiotic exposure associated with obesity at age 4 years. Associations disappeared in sibling and twin analysis. No association with antibiotic exposure before pregnancy was found. | |
| Li DK et al. Infection and antibiotic use in infancy and risk of childhood obesity: a longitudinal birth cohort study. Lancet Diabetes Endocrinol. 2017.34 | USA | Vaginally delivered and C-section N = 260 556 | NR | NR | NR | Antibiotic exposure during the first 12 months of life. | Obesity, during the follow-up, up to 18 years of age. | No association with antibiotic use during infancy and obesity in childhood was found. | |
| Li DK et al. Maternal infection and antibiotic use in pregnancy and the risk of childhood obesity in offspring: a birth cohort study. Int J Obes (Lond). 2020.20 | USA | Vaginally delivered and C-section N = 145 393 | NR | Antibiotic use during pregnancy | NR | NR | BMI z-score for obesity up to 10 years of age. | No association with antibiotic use during pregnancy and childhood obesity was found once underlying infection was controlled for. | |
| Li P et al. Early-life antibiotic exposure increases the risk of childhood overweight and obesity in relation to dysbiosis of gut microbiota: a birth cohort study. Ann Clin Microbiol Antimicrob. 2022.56 | China | Vaginally delivered and C-section N = 2140 | NR | NR | NR | Antibiotic exposure during the first year of life. | Length for age Z-score, weight for age Z score, BMI for Z score, obesity and overweight. | Overweight and obesity were higher in the antibiotic exposed group at 2.5 years old. | |
| Lin, M. et al. Sex-specific associations between prenatal antibiotics exposure and offspring’s body mass index. Int J Obes. 2020.23 | China | Vaginally delivered and C-section N = 10 163 | NR | Antibiotic use during pregnancy | NR | NR | BMI z-score for age, childhood overweight and childhood obesity. | Association between prenatal antibiotic use and higher BMI z-score from 1 to 4 years old was found in female offspring. No association was found in male offspring. | |
| Margetaki K et al. Prenatal and infant antibiotic exposure and childhood growth, obesity and cardiovascular risk factors: The Rhea mother-child cohort study, Crete, Greece. Pediatr Obes. 2022.24 | Greece | Vaginally delivered and C-section N = 747 | NR | Oral antibiotic exposure before the pregnancy week 30. | NR | Antibiotic exposure during the first 9 months of life. | BMI Z-scores, obesity, excessive body fat at 4 and 6 years of age. | Prenatal antibiotic exposure was associated with increase in the risk for obesity and abdominal obesity at 6 years of age. No association in any of the outcomes at age 4 or any of the growth outcomes across 2-7 years of life. Postnatal exposure to antibiotics was associated with increased weight from 2 to 7 years of life. | |
| Mbakwa CA et al. Early Life Antibiotic Exposure and Weight Development in Children. J Pediatr. 2016.57 | Netherlands | N = 979 | NR | NR | NR | Antibiotic prescriptions during the first 10 years of life. | Weight z-scores, height z-scores, BMI z-scores and overweight from the birth up to 10 years of age. | Association between exposure to antibiotics in the first 6 months of life and increased weight was found. Association between exposure to more than 2 courses of antibiotics in the second year of life and increased weight and height z-scores was found. No association between other exposures and anthropometric outcomes was found. | |
| Mitchell EA, et al. ISAAC Phase Three Study Group. Factors associated with body mass index in children and adolescents: An international cross-sectional study. PLoS One. 2018.58 | 15 countries | N = 65 721 | NR | NR | NR | Antibiotic exposure in the first year of life. | BMI at the age of 6-7 years or 13-14 years. | Association with antibiotics in the first year of life and increased BMI was found. | |
| Metz TD et al. Exposure to group B Streptococcal antibiotic prophylaxis and early childhood body mass index in a vaginal birth cohort. J Matern Fetal Neonatal Med. 2020.6 | USA | Vaginally delivered  N = 4825 | NR | NR | Intrapartum antibiotic prophylaxis and positive GBS culture result. | NR | First available BMI Z-score at 2-5 years of age. | No association was found. | |
| Mor, A. et al. Prenatal exposure to systemic antibacterials and overweight and obesity in Danish schoolchildren: a prevalence study. Int J Obes. 2015.25 | Denmark | Vaginally delivered and  C-section  N = 9886 | NR | Maternal antibiotic prescription from 30 days before the estimated conception and/or maternal inpatient, emergency, or outpatient hospital contact with infection between the estimated conception date and childbirth. | NR | NR | BMI, classified into three non-overlapping categories of normal weight, overweight and obesity at school age (median 14 years, range 7-16 years). | Associations between prenatal antibiotic exposure and prevalence ratios of overweight and obesity were found at school age. Associations varied by birth weight. | |
| Mueller NT et al. Prenatal exposure to antibiotics, cesarean section and risk of childhood obesity. Int J Obes (Lond). 2015.26 | USA | Vaginally delivered and  C-section  N = 436 | NR | Antibiotic use during pregnancy | NR | NR | Weight and body composition, waist circumference, BMI z-score and obesity at 7 years of age. | Association between antibiotic exposure in second or third trimester and higher risk for obesity was found. | |
| Mukhopadhyay S et al. Intrapartum group B Streptococcal prophylaxis and childhood weight gain. Arch Dis Child Fetal Neonatal Ed. 2021. 11 | USA | Vaginal delivery cohort  N = 9539  C-section cohort  N = 4265 | NR | NR | GBS-IAP = Intravenous penicillin, ampicillin, cefazolin, clindamycin or vancomycin administered to the mother ≥ 4 hours prior to delivery.  Other antibiotics = all other forms of intravenous antibiotics and GBS-IAP antibiotics administered < 4 hours prior to delivery. | NR | Weight change over time, adjusted for height during the first 5 years of life. | Association with GBS-IAP and elevated weight gain in the first 5 years of life was found, effect estimate was greater among children born by C-section. | |
| Murphy R, et al. Early antibiotic exposure and body mass index in children born small for gestational age. Acta Paediatr. 2013.40 | Europe | Vaginally delivered and  C-section  N = 871 | NR | NR | NR | Antibiotic exposure in the first year of life. | BMI z-score at the 3.5, 7 and 11 years of age. | No association between antibiotic exposure and in childhood BMI Z-score was found in children born small for gestational age or non-small for gestational age was found. | |
| Murphy R, et al. Antibiotic treatment during infancy and increased body mass index in boys: an international cross-sectional study. Int J Obes (Lond). 2014.42 | 18 countries | Vaginally delivered and  C-section  N = 74 946 | NR | NR | NR | Antibiotic exposure in the first year of life. | BMI at the age of 5-8 years. | Association with antibiotic exposure in the first year of life and increased childhood BMI was found in boys but not in girls. | |
| Ohler AM et al. Infections and antibiotic use in early life, and obesity in early childhood: a mediation analysis. Int J Obes (Lond). 2022.35 | USA | Vaginally delivered and  C-section  N = 61 330 | NR | NR | NR | Antibiotic claim during the first year of life. | Obesity at the age of 2 to 14 years old. | Weak association with antibiotic exposure and obesity in childhood was found. | |
| Park YJ et al. Association of class number, cumulative exposure, and earlier initiation of antibiotics during the first two-years of life with subsequent childhood obesity. Metabolism. 2020.59 | South-Korea | Vaginally delivered and  C-section  N = 31 733 | NR | NR | NR | Antibiotic exposure during the first 24 months of life. | Obesity at the age of 30 months to 36 months. | Dose-response relationship between obesity and number of antibiotic classes, cumulative days and earlier antibiotic initiation was found. | |
| Poulsen MN et al. Associations of prenatal and childhood antibiotic use with child body mass index at age 3 years. Obesity (Silver Spring). 2017.7 | USA | Vaginally delivered and  C-section  N = 8793 | NR | Antibiotic exposure from the conception date to the delivery date (included in the prenatal antibiotic exposure). | Antibiotic exposure in delivery date and day before delivery. | Antibiotic exposure in lifetime (through day 1 before the age 3) and in the first year of life. | Child BMI z-score at 3 years of age. | No association with prenatal antibiotic exposure (including antibiotic exposure during the delivery date and date before delivery) and BMI z-score at 3 years was found. Association with repeated antibiotic courses and higher BMI z-score was found during the lifetime and the first year of life. | |
| Prins-van Ginkel AC et al. Early childhood infections and body mass index in adolescence. Int J Obes (Lond). 2021.36 | Netherlands | N = 662 | NR | NR | NR | Antibiotic prescription in the first 3 years of life | BMI Z-score at 12 or 16 years | No significant association between antibiotic prescriptions and BMI z-score was found. | |
| Rifas-Shiman SL et al. Early Life Antibiotic Prescriptions and Weight Outcomes in Children 10 Years of Age. Acad Pediatr. 2021.60 | USA | N = 56 727 | NR | NR | NR | Antibiotic prescription before 24 months of age. | BMI-z measured closest to 120 months of age (108-132 mo). Overweight and obesity. | Association with antibiotic use < 24 months and slightly higher BMI z-score at 10 years was found. No association with overweight or obesity was found. | |
| Saari A, Virta LJ, Sankilampi U, Dunkel L, Saxen H. Antibiotic exposure in infancy and risk of being overweight in the first 24 months of life. Pediatrics. 2015.61 | Finland | N = 12 062 | NR | NR | NR | Purchased antibiotics from birth to 24 months of age. | BMI-for-age z-score, Height-for-age z-score Overweight and obesity at 24 months of age. | Association between antibiotic exposure in infancy and enhanced growth in weight and height at the age of 24 months was found. | |
| Sakurai K et al. Association between maternal antibiotic exposure during pregnancy and childhood obesity in the Japan Environment and Children's Study. Pediatr Obes. 2022.27 | Japan | Vaginally delivered  N = 56 416 | NR | Systemic antibiotic use during pregnancy | NR | NR | BMI and besity at 3 years of age. | Antibiotic exposure during the second or third trimester was associated with obesity at 3 years of age in female infants. | |
| Schwartz BS et al. Antibiotic use and childhood body mass index trajectory. Int J Obes (Lond). 2016.62 | USA | Vaginally delivered and  C-section  N =  163 820 | NR | NR | NR | Antibiotic exposure during the age 3 to 18 years. | BMI z-score at age 3-18 years. | Association between cumulative orders of antibiotics and increase in BMI was found. | |
| Scott FI. Administration of Antibiotics to Children Before Age 2 Years Increases Risk for Childhood Obesity. Gastroenterology. 2016.69 | United Kingdom | Vaginally delivered and  C-section  N = 21 714 | NR | NR | NR | Antibiotic exposure during the first 2 years of life. | Obesity at 4 years of age. | Antibiotic exposure associated with an increased risk of obesity at 4 years of age. | |
| Sejersen TS, et al. Antibiotic exposure in infancy and development of BMI and body composition in childhood. EClinicalMedicine. 2019.37 | Denmark | Vaginally delivered  and  C-section  N = 661 | NR | NR | NR | Antibiotic exposure during the first year of life. | BMI Z-score, overweight and obesity at 1 to 6 years of age. Body composition determined by dual-energy X-ray at 3.5 and 6 years of age. | No association with antibiotic exposure in the first year of life and childhood BMI z-score or body composition was found. | |
| Sidell MA et al. Higher body mass index after intrapartum antibiotic exposure in children persists over 10-years. Pediatr Obes. 2023.13 | USA | Vaginally delivered  N =  126 546  C-section  N = 47 349 | NR | NR | GBS IAP = IAP for perinatal GBS disease  for ≥4 h before delivery  Other IAP = any other type of duration intrapartum antibiotics | NR | BMI development over 10 years | Exposure to GBS-IAP associated with increased BMI persisting to age 10 years compared to no exposure in both vaginal delivery and C-section. | |
| Stark CM et al. Antibiotic and acid-suppression medications during early childhood are associated with obesity. Gut. 2019.63 | USA | N =  333 353 | NR | NR | NR | Antibiotic prescription during the first 2 years of life. | Obesity at 2 to 9 years of age. | Obesity associated with antibiotic use during the first two years of life. | |
| Tian J et al. Application of antibiotics before 3 years of age increases the risk of childhood overweight and obesity. Exp Ther Med. 2021.64 | China | Vaginally delivered and  C-section  N = 4682 | NR | NR | NR | Antibiotic exposure before 3 years of age. | BMI, BMI-P percentage score, overweight and obesity at 3 years of age. | Application of antibiotics associated with overweight and obesity in 3-year-old children. | |
| Trasande L et al. Infant antibiotic exposures and early-life body mass. Int J Obes (Lond). 2013.65 | United Kingdom | Vaginally delivered and  C-section  N = 11 532 | NR | NR | NR | Antibiotic exposure before 6 months of age, between 6 to 14 months of age and between 15 to 23 months of age. | Weight-for-length *Z*-score at 6 weeks, 10 months and 20 months of age, BMI *Z*-score 38 months and 7 years of age, and overweight and obesity at 38 months and 7 years. | Association between antibiotic exposure < 6 months and increased, weight-for-length Z-score at 10 and 20 months, BMI Z-score at 38 months and overweight at 38 months was found. Antibiotic exposure at 15 to 23 months associated with increased BMI z-score at 7 years. | |
| Uzan-Yulzari A. Neonatal antibiotic exposure impairs child growth during the first six years of life by perturbing intestinal microbial colonization. Nat Commun. 2021.66 | Finland  and  Germany | Vaginally delivered and  C-section  N = 12 422 (Finland)  N = 1707 (Germany) | NR | NR | NR | Antibiotic exposure in the first 14 days of life (neonatal antibiotic exposure).  Antibiotic exposure in 14 days to 6 years of life. | Weight Z-score, Height Z-score, BMI Z-score up to 6 years of age. | Neonatal antibiotic exposure associated with lower weight in the first 6 years of life and lower height and BMI in the first 2 to 7 years of life in males. No association was found in females. Antibiotic exposure after neonatal period associated with higher BMI in both males and females. | |
| Ville et al. Early antibiotic exposure and Risk of Childhood Obesity in Latinos. Child Obes. 2017.67 | USA (Latino origin) | N = 97 | NR | NR | NR | Antibiotic exposure in the first 0 to 12 months of life | Child obesity at 2 years of age. | Antibiotic use during the first 6 months associated with increased risk of obesity at the age of 2 years. | |
| Wang B et al. Prenatal Exposure to Antibiotics and Risk of Childhood Obesity in a Multicenter Cohort Study. Am J Epidemiol. 2018.28 | USA | Vaginally delivered and  C-section  N = 43 665 | NR | Antibiotic exposure during pregnancy. | NR | NR | BMI z-score and percentile, overweight and obesity at 4 years and 7 years. | Repeated prenatal exposure to antibiotics associated with childhood obesity at 7 years. No association with prenatal antibiotic exposure and obesity or BMI z-score at the age of 4 years was found. | |
| Zhang M et al. Association of prenatal antibiotics with measures of infant adiposity and the gut microbiome. Ann Clin Microbiol Antimicrob. 2019.29 | USA | Vaginally delivered and C-section  N = 454 | NR | Antibiotic use during pregnancy | NR | NR | Infant weight, length, skinfold thicknesses (overall and central adiposity) and WFL-z-scores at 12 months of age. | Second-trimester antibiotic exposure associated with higher infant WFL-z and subscapular skinfold thickness at 12 months of age after controlling for delivery mode. | |
| Zhuang C. Association between the use of antibiotics during pregnancy and obesity in 5-year-old children. Transl Pediatr. 2021.30 | China | Vaginally delivered and  C-section  N = 132 | NR | Outpatient prescription of antibiotics during the 9 months before the child’s birth. | NR | NR | Obesity at 5 years of age. | Association between prenatal antibiotic exposure and obesity and higher BMI at 5 years was found. | |
| **Meta-analyses** | | | | | | | | | |
|  | **Studies** | | **Antibiotic exposure before pregnancy** | **Antibiotic exposure during pregnancy** | **Antibiotic exposure**  **during birth** | **Antibiotic exposure after birth** | **Outcome** | | **Findings** |
| Aghaali M et al. Association between early antibiotic exposure and risk of childhood weight gain and obesity: a systematic review and meta-analysis. J Pediatr Endocrinol Metab. 2019.70 | 19 studies | | NR | NR | NR | Antibiotic exposure from birth to 2 years of age. | Childhood overweight or obesity, difference in childhood BMI or weight between the exposed and unexposed group. | | Association with antibiotic exposure and increased risk of childhood weight gain and obesity was found. |
| Chagas et al. Early life exposure to antibiotics and excess body weight in childhood an adolescence: A systematic review and meta-analysis. Obesity Research and Clinical Practice. 2023.14 | 12 studies pooled in the meta-analysis | | NR | Antenatal antibiotic exposure | NR | Antibiotic exposure in infancy or childhood. | Weight-for-age z-score or percentile BMI z-score or perecentile, and overweight/obesity defined by BMI-for-age z-score or percentile. | | Overall antenatal and second trimester exposure to antibiotics were associated with increased risk of overweight/obesity in childhood/adolescence. Postnatal antibiotic exposure associated with increased risk of overweight/obesity. |
| Duong QA, et al. Antibiotic exposure and adverse long-term health outcomes in children: A systematic review and meta-analysis. J Infect. 2022.71 | 10 studies | | NR | NR | NR | Antibiotic exposure in infancy or childhood. | Increased weight gain or overweight or obesity in childhood. | | Antibiotic exposure in early life associated with overweight and obesity in childhood. |
| Meng X et al. Dose-response association of early-life antibiotic exposure and subsequent overweight or obesity in children: A meta-analysis of prospective studies. Obes Rev. 2021.72 | 10 studies | | NR | NR | NR | Early antibiotic exposure in 0 to 48 months, divided in low-level exposure, defined as ≤3 prescriptions and high-level exposure defined as >3 prescriptions. | Overweight or obesity at 2 to 10 years. | | Association with early life antibiotic exposure and increased risk of obesity or overweight was found. |
| Miller SA et al. The association between antibiotic use in infancy and childhood overweight or obesity: a systematic review and meta-analysis. Obes Rev. 2018.73 | 10 studies | | NR | NR | NR | Antibiotic exposure in the < 24 months of age. | Overweight or obesity in childhood. | | Association with antibiotic exposure at < 24 months of age and a small increased risk of childhood overweight or obesity was found. |
| Rasmussen SH, et al. Antibiotic exposure in early life and childhood overweight and obesity: A systematic review and meta-analysis. Diabetes Obes Metab. 2018.74 | 8 studies | | NR | NR | NR | Antibiotic exposure < 24 months of age. | BMI z-score, overweight or obesity in childhood. | | Association with antibiotic exposure < 24 months of age and increased risk of childhood overweight and obesity was found. |
| Shao X, et al. Antibiotic Exposure in Early Life Increases Risk of Childhood Obesity: A Systematic Review and Meta-Analysis. Front Endocrinol (Lausanne). 2017.75 | 15 studies | | NR | NR | NR | Antibiotic exposure in < 24 months of age. | Overweight or obesity in childhood, BMI z-score. | | Association with antibiotic exposure and increased BMI and overweight was found. |
| Solans et al. Prenatal exposure to antibiotics and risk of childhood overweight or obesity: A systematic review and meta-analysis. Obesity Reviews. *2022.3* | 10 studies | | NR | Any reported antibiotic use during pregnancy (9/10) | Intrapartum antibiotic prophylaxis and positive GBS culture result (1/10) | NR | Overweight/Obesity, BMI z-score, WFL z-score at 1 to 16 years | | No clear pattern of association was observed. Suggestive associations for ≥ 3 antibiotic courses and exposure in second trimester. |
| Srivastava A et al. Early and frequent exposure to antibiotics in children and the risk of obesity: systematic review and meta-analysis of observational studies. F1000Res. 2020.2 | 13 studies | | NR | Maternal prenatal antibiotic exposure (4/13) | Intrapartum antibiotic exposure (1/13) | Postnatal antibiotic exposure (birth to 18 years) (9/13) | Overweight or obesity in childhood. | | Effect of prenatal antibiotic exposure on the risk of being overweight was not statistically significant. A Statistically significant impact of early antibiotic exposure and the risk of overweight and obesity later in childhood was found (very low-quality evidence). |
| Wan et al. Impact of exposure to antibiotics during pregnancy and infancy on childhood obesity: a systematic review and meta-analysis.Obesity. 2020.15 | 23 studies | | NR | Antibiotic exposure during pregnancy (8/23) | NR | Exposure to antibiotics in infancy, < 2 years.  (16/23) | Birth weight, overweight/obesity, BMI z-score, % body fat at 1-14.5 years. | | No association between prenatal antibiotic exposure and overweight/obesity, however association with overweight in second trimester was found. Association between antibiotic exposure during infancy and childhood overweight or obesity was found. |
| Abbreviations: NR, not reported; BMI, body mass index; WFL, weight-for-length | | | | | | | | | |
